# Supplementary material for: Benz(2-heteroaryl)cyanoximes and their Tl(i) complexes: new room temperature blue emitters
Source: Royal Society of Chemistry journal article supplement (doi:10.1039/b803846e), 2008-01-01

Preparation of HBOCO and HQCO ligands from respective substituted acetonitriles that are not commercially available.

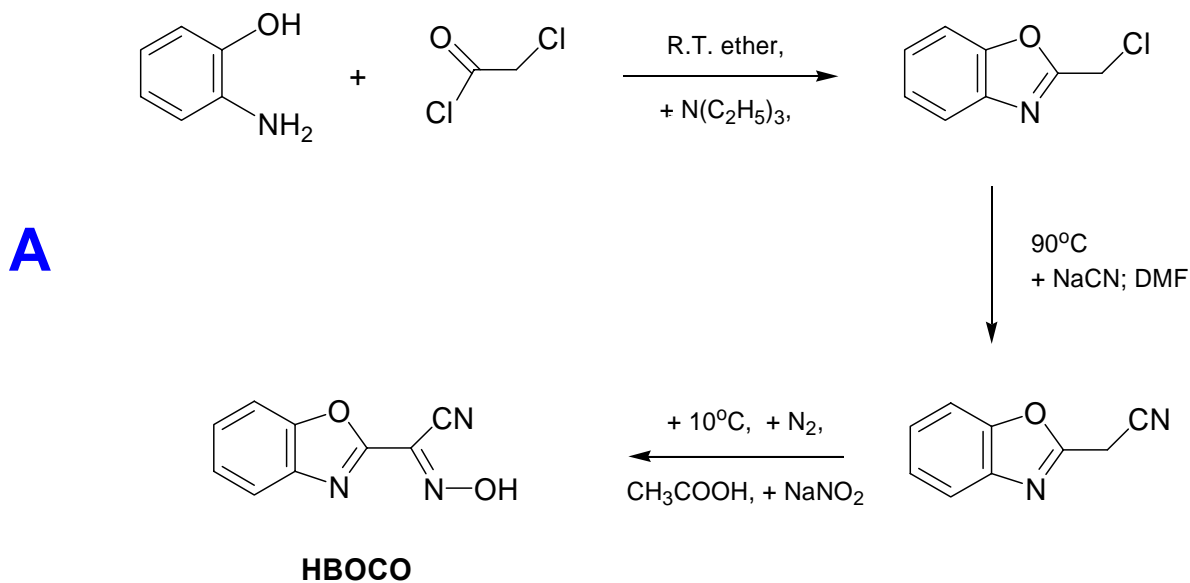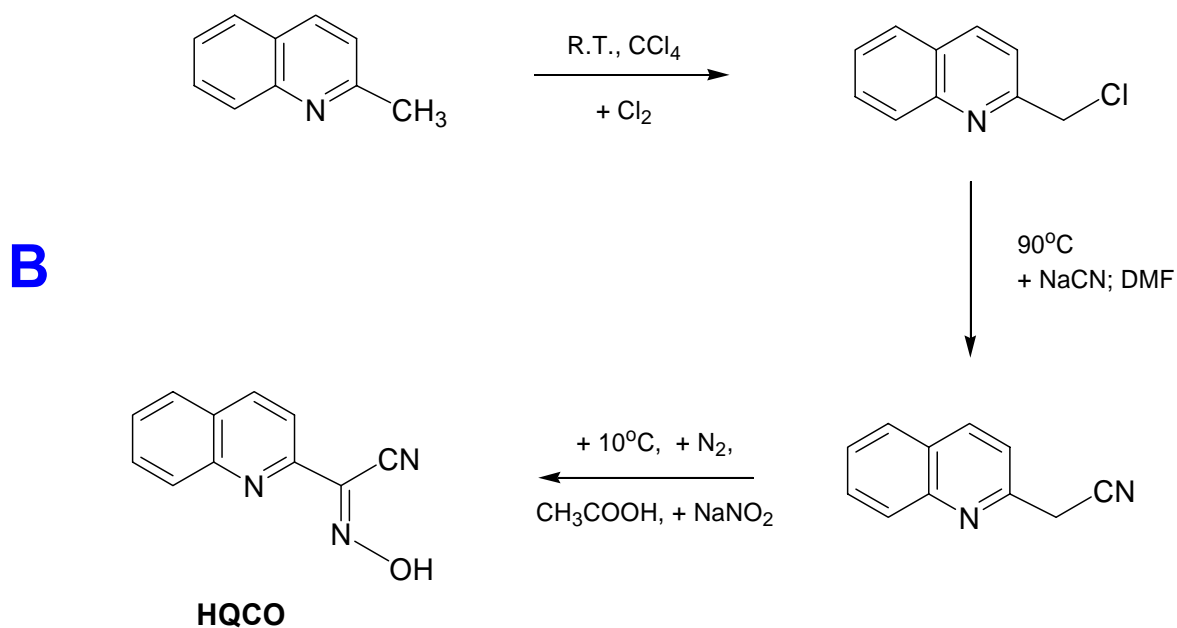

Results of  $^{13}\text{C}\{^1\text{H}\}$  NMR spectroscopic investigations of benz(2-heteroaryl) cyanoximes.

| Cyanoxime                                                                                                                                                                                                                                                                                                                                                                                                                                                                                                                                                                                                                                                            | Chemical shift, ppm                                                                                                                                                                                                                                                                           |
|----------------------------------------------------------------------------------------------------------------------------------------------------------------------------------------------------------------------------------------------------------------------------------------------------------------------------------------------------------------------------------------------------------------------------------------------------------------------------------------------------------------------------------------------------------------------------------------------------------------------------------------------------------------------|-----------------------------------------------------------------------------------------------------------------------------------------------------------------------------------------------------------------------------------------------------------------------------------------------|
| <p>75 % <i>anti</i>- and 25% <i>syn</i>- isomers in dms<math>o</math>-d<math>_6</math> solution at 298 K</p> <p style="text-align: center;"><b>HBIMCO</b></p> 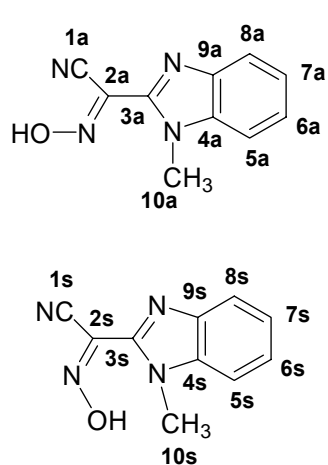 <p>The HBIMCO structures show a benzimidazole ring system with a methyl group at position 10 and a cyanoxime group at position 2. The <i>anti</i> isomer (top) has the methyl group and cyanoxime group on opposite sides of the benzimidazole ring. The <i>syn</i> isomer (bottom) has them on the same side. Carbon atoms are labeled 1a-10a for the <i>anti</i> isomer and 1s-10s for the <i>syn</i> isomer.</p> | <p>1a 109.92<br/>2a 127.05<br/>3a 143.76<br/>4a 137.44<br/>5a 111.52<br/>6a 120.55<br/>7a 123.55<br/>8a 125.09<br/>9a 142.58<br/>10a 33.01</p> <p>1s 115.08<br/>2s 127.71<br/>3s 141.95<br/>4s 136.18<br/>5s 111.76<br/>6s 120.60<br/>7s 123.61<br/>8s 124.87<br/>9s 142.58<br/>10s 32.59</p> |
| <p>90 % <i>anti</i>- and 10% <i>syn</i>- isomers in dms<math>o</math>-d<math>_6</math> solution at 298 K</p> <p style="text-align: center;"><b>HBTCO</b></p>  <p>The HBTCO structures show a benzothiazole ring system with a methyl group at position 10 and a cyanoxime group at position 2. The <i>anti</i> isomer (top) has the methyl group and cyanoxime group on opposite sides of the benzothiazole ring. The <i>syn</i> isomer (bottom) has them on the same side. Carbon atoms are labeled 1a-9a for the <i>anti</i> isomer and 1s-9s for the <i>syn</i> isomer.</p>    | <p>1a 109.08<br/>2a 160.17<br/>3a 152.97<br/>4a 134.25<br/>5a 123.17<br/>6a 127.81<br/>7a 127.75<br/>8a 124.31<br/>9a 129.31</p> <p>1s 129.26<br/>2s 114.39<br/>3s 150.96<br/>4s 136.24<br/>5s 123.31<br/>6s 128.10<br/>7s 127.93<br/>8s 124.71<br/>9s 131.93</p>                             |

Results of  $^{13}\text{C}\{^1\text{H}\}$  NMR spectroscopic investigations of benz(2-heteroaryl) cyanoximes (continued).

| Cyanoxime                                                                                                                                                                                                                                                                                                                                                      | Chemical shift, ppm                                                                                                                                                                                                                                               |
|----------------------------------------------------------------------------------------------------------------------------------------------------------------------------------------------------------------------------------------------------------------------------------------------------------------------------------------------------------------|-------------------------------------------------------------------------------------------------------------------------------------------------------------------------------------------------------------------------------------------------------------------|
| <p>70 % <i>anti</i>- and 30% <i>syn</i>- isomers in dms<math>o</math>-d<math>_6</math> solution at 298 K; <i>anti</i>- isomer exhibits dynamic proton exchange (tautomerism) between nitrogen atoms of the heterocycle</p> <p style="text-align: center;"><b>HBIHCO</b></p> 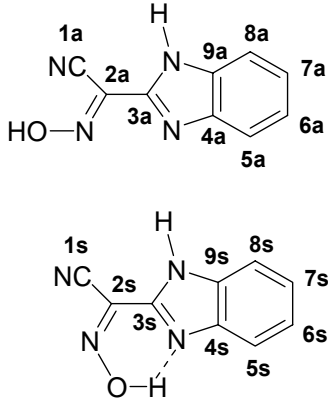 | <p>1a 112.72<br/>2a 135.17<br/>3a 143.76<br/>4a, 9a 123.16<br/>5a, 8a 120.38<br/>6a, 7a 124.79</p> <p>1s 109.70<br/>2s 140.74<br/>3s 144.26<br/>4s, 9s 128.59<br/>5s, 8s 114.79<br/>6s, 7s 125.99</p>                                                             |
| <p>50 % <i>anti</i>- and 50% <i>syn</i>- isomers in dms<math>o</math>-d<math>_6</math> solution at 298 K</p> <p style="text-align: center;"><b>HBOCO</b></p>                                                                                                                | <p>1a 109.11<br/>2a 129.33<br/>3a 160.24<br/>4a 134.25<br/>5a 124.32<br/>6a 127.86<br/>7a 127.81<br/>8a 123.23<br/>9a 152.98</p> <p>1s 114.66<br/>2s 128.11<br/>3s 152.82<br/>4s 132.00<br/>5s 124.60<br/>6s 127.27<br/>7s 126.34<br/>8s 123.18<br/>9s 150.96</p> |

Results of  $^{13}\text{C}\{^1\text{H}\}$  NMR spectroscopic investigations of benz(2-heteroaryl) cyanoximes (continued).

| Cyanoxime                                                                                                                                                                                                                     | Chemical shift, ppm                                                                                                                                                                                                                                                                                                                                                                                                                                                                                                                                                |
|-------------------------------------------------------------------------------------------------------------------------------------------------------------------------------------------------------------------------------|--------------------------------------------------------------------------------------------------------------------------------------------------------------------------------------------------------------------------------------------------------------------------------------------------------------------------------------------------------------------------------------------------------------------------------------------------------------------------------------------------------------------------------------------------------------------|
| <p>Mixture of 87.5 % <i>anti</i>- and 12.5% <i>syn</i>-isomers in acetone-<math>\text{d}_6</math> solution at 298 K</p> <p><b>HQCO</b></p> 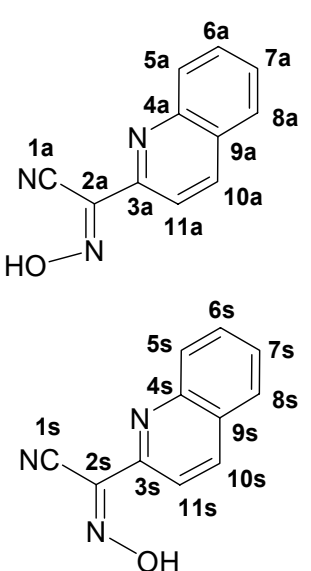 | <p>1a 109.11<br/>           2a 137.68<br/>           3a 149.73<br/>           4a 147.71<br/>           5a 128.18<br/>           6a 128.21<br/>           7a 130.65<br/>           8a 129.71<br/>           9a 128.68<br/>           10a 117.21<br/>           11a 137.48</p> <p>1s not found<br/>           2s not found<br/>           3s 150.30<br/>           4s 148.05<br/>           5s 127.01<br/>           6s 128.06<br/>           7s 130.20<br/>           8s 129.09<br/>           9s not found<br/>           10s 120.58<br/>           11s 134.68</p> |

**Table.** Data of IR spectroscopic studies of synthesized benz(2-heteroaryl)cyanoximes and their Tl(I) complexes.

| Ligand studied                                                                     | Compound         | Observed and assigned frequencies, cm <sup>-1</sup> |                                 |                               |                                       |                                         |                          |                    |
|------------------------------------------------------------------------------------|------------------|-----------------------------------------------------|---------------------------------|-------------------------------|---------------------------------------|-----------------------------------------|--------------------------|--------------------|
|                                                                                    |                  | $\nu(\text{O-H})$                                   | $\nu(\text{C-H})^{\text{arom}}$ | $\nu(\text{C}\equiv\text{N})$ | $\nu(\text{C}=\text{N})^{\text{het}}$ | $\nu(\text{C}=\text{N})^{\text{oxime}}$ | $\nu(\text{C}=\text{C})$ | $\nu(\text{N-O})$  |
| 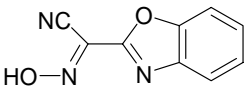  | <b>HBOCO</b>     | 3433                                                | 3101                            | 2243                          | 1612                                  | 1585                                    | 1460                     | 1045               |
|                                                                                    | <b>Tl(BOCO)</b>  | -                                                   | 3094                            | 2220                          | 1610                                  | 1407                                    | 1455                     | 1160               |
|   | <b>HBTCO</b>     | 3240                                                | 3075                            | 2236                          | 1590                                  | 1575                                    | 1510                     | 1063               |
|                                                                                    | <b>Cs(BTCO)</b>  | -                                                   | 3054                            | 2207                          | 1590                                  | 1372                                    | 1506                     | 1209               |
|                                                                                    | <b>Tl(BTCO)</b>  | -                                                   | 3060                            | 2207                          | 1590                                  | 1415                                    | 1507                     | 1148               |
|  | <b>HBIHCO</b>    | 3345, 3284*                                         | 3061                            | 2239                          | 1614                                  | 1533                                    | 1441                     | 1065               |
|                                                                                    | <b>Tl(BIHCO)</b> | 3411, 3287*                                         | 3054                            | 2211                          | 1610                                  | 1540, 1522                              | 1449                     | 1185, 1166<br>1103 |

\* –  $\nu^{\text{as}}(\text{NH})$  and  $\nu^{\text{s}}(\text{NH})$  respectively

**Table. Data of IR spectroscopic studies of synthesized benz(2-heteroaryl)cyanoximes and their Tl(I) complexes (continued).**

| Ligand                                                                             | Observed and assigned frequencies, cm <sup>-1</sup> |                                 |                               |                                       |                                         |                          |                   |       |
|------------------------------------------------------------------------------------|-----------------------------------------------------|---------------------------------|-------------------------------|---------------------------------------|-----------------------------------------|--------------------------|-------------------|-------|
|                                                                                    | $\nu(\text{O-H})$                                   | $\nu(\text{C-H})^{\text{arom}}$ | $\nu(\text{C}\equiv\text{N})$ | $\nu(\text{C}=\text{N})^{\text{het}}$ | $\nu(\text{C}=\text{N})^{\text{oxime}}$ | $\nu(\text{C}=\text{C})$ | $\nu(\text{N-O})$ |       |
| 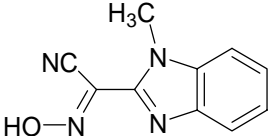  | <b>HBIMCO</b>                                       | 3550                            | 3023                          | 2236                                  | 1610                                    | 1596                     | 1478, 1451        | 1090  |
|                                                                                    | <b>Tl(BIMCO)</b>                                    | -                               | 3050                          | 2210                                  | 1610                                    | 1500, 1468               | 1468, 1447        | 1220, |
|  | <b>HQCO</b>                                         | 3570                            | 3030                          | 2230                                  | 1596                                    | 1615                     | 1508              | 1030  |
|                                                                                    | <b>Cs(QCO)</b>                                      | -                               | 3042                          | 2200                                  | 1604                                    | 1328                     | 1505              | 1210  |
|                                                                                    | <b>Tl(QCO)</b>                                      | -                               | 3060, 3042                    | 2217, 2210                            | 1596                                    | 1429                     | 1503              | 1188  |

Side by side photographs of crystals of HBIMCO x H<sub>2</sub>O and HBOCO showing difference in color between the two 2-benz(heteroarylcyanoximes) attributed to solid state autoionization of the latter.

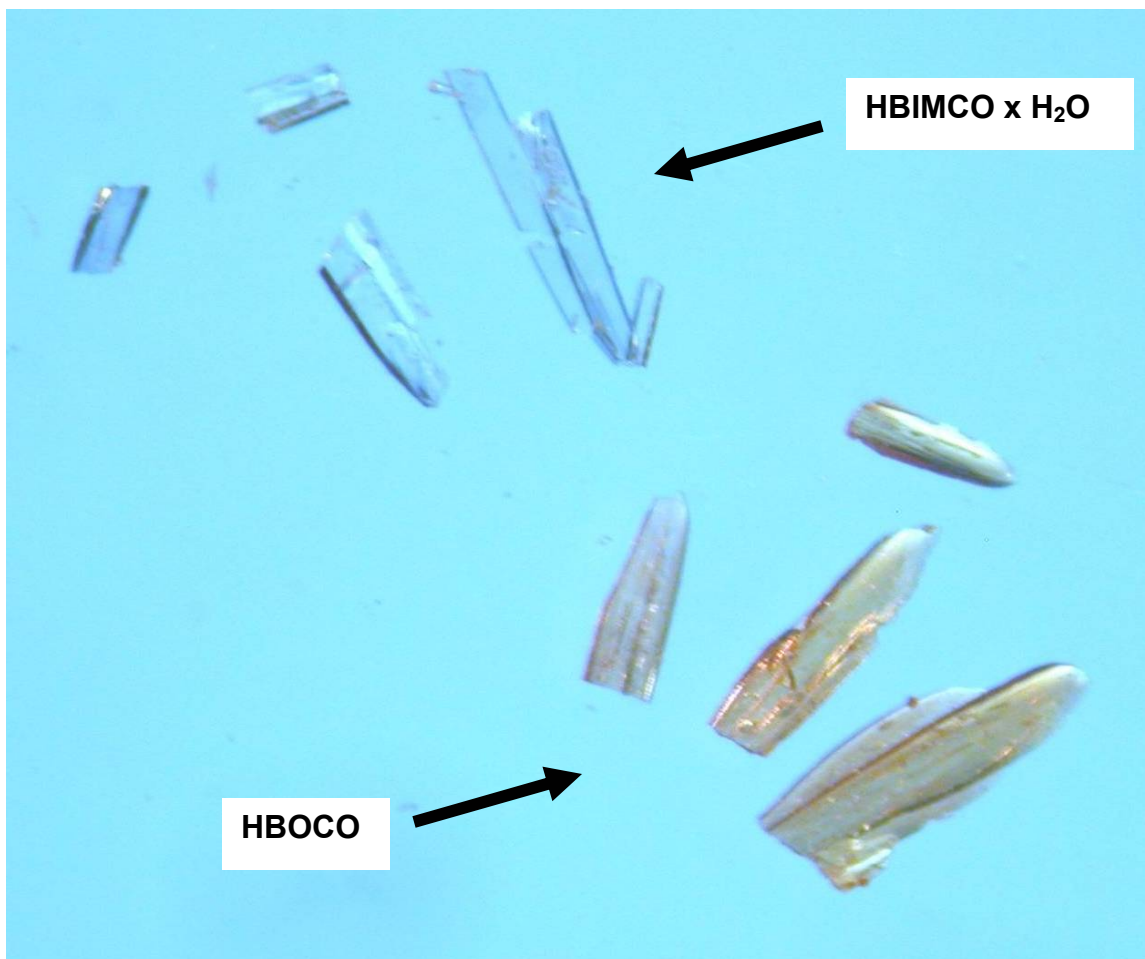

Picture taken at  $\times 60$  magnification on the Nikon microscope equipped with digital camera.

Crystal packing diagram for the structure of HBOCO: schematic representation, where A and B represent anionic ( $\text{BOCO}^-$ ) and cationic ( $\text{H}_2\text{BCO}^+$ ) portions respectively.

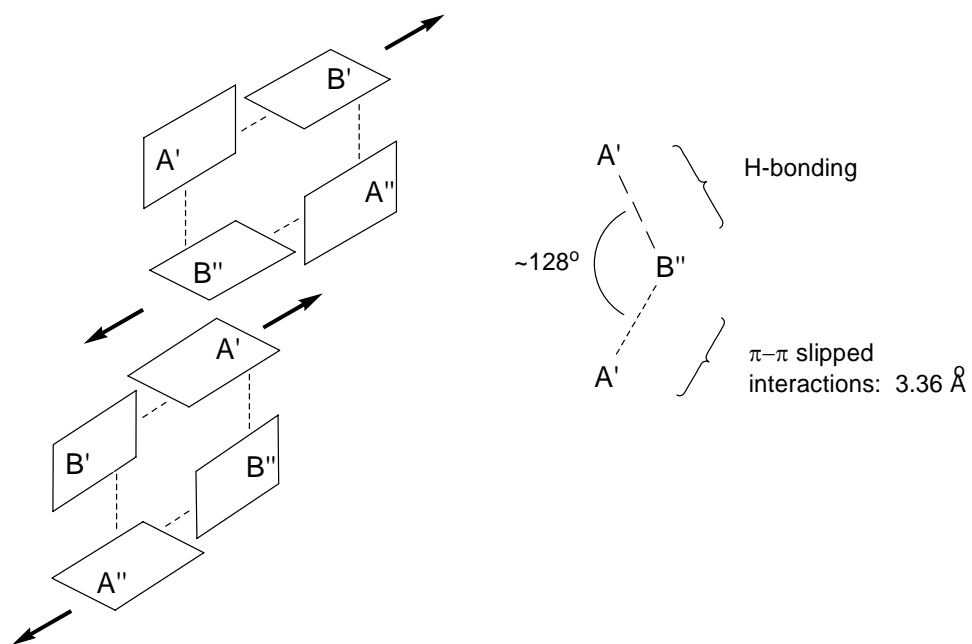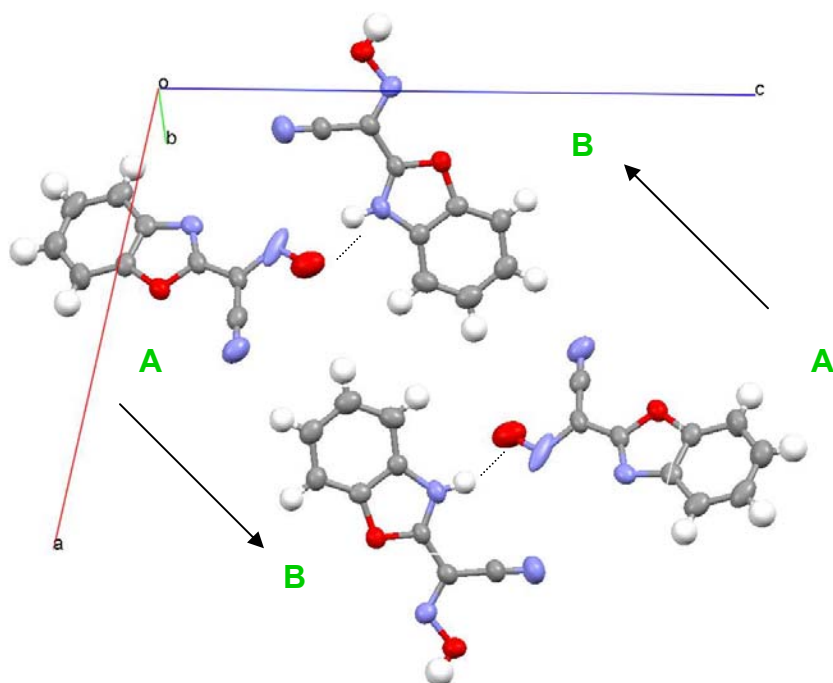

View along  $b$  direction showing only two isolated **HBOCO** dimers forming A-B "head-to-tail" H-bonded polymeric sheets.



Fragment of crystal structure of HBOCO showing two isolated molecules (cationic  $\text{H}_2\text{BCO}^+$  and anionic  $\text{BCO}^-$ ) from two adjacent layers engaged into short "slipped"  $\pi-\pi$  interactions. Displayed are two orthogonal views (A and B) of the unit cell.

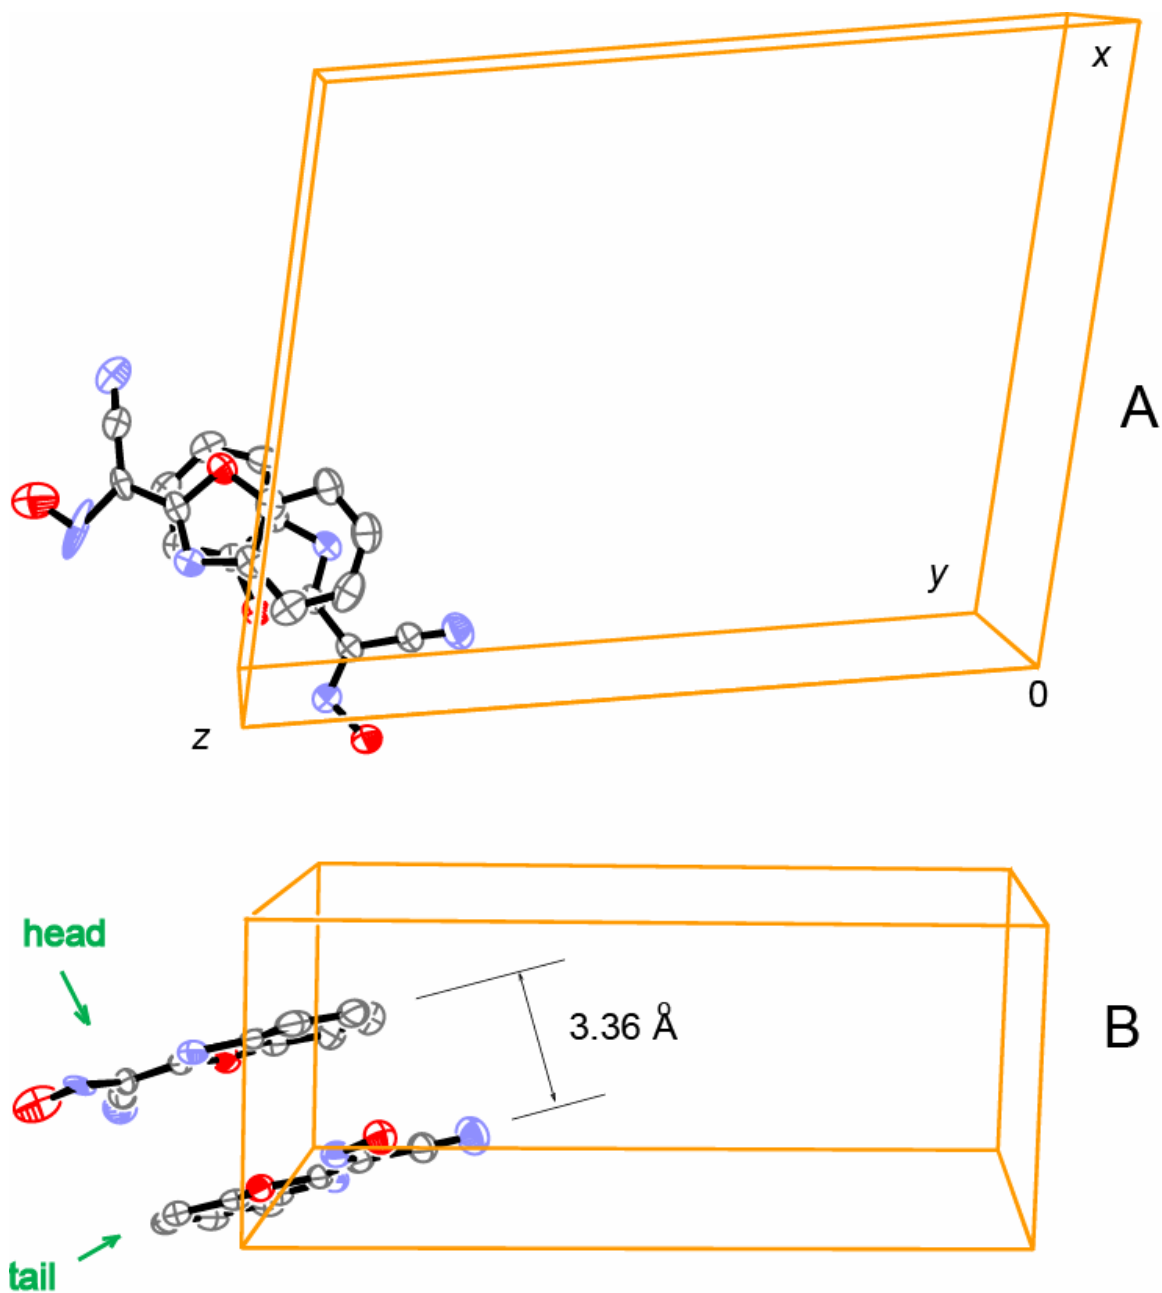

**Organization of the crystal structure of HBOCO: views down  $y$  axis (A) and  $x$  axis (B) showing  $\pi$ - $\pi$  stacking interactions between sheets of HBOCO dimers. Coloring scheme: C – grey, O – red, N – blue; hydrogen atoms are omitted for clarity.**

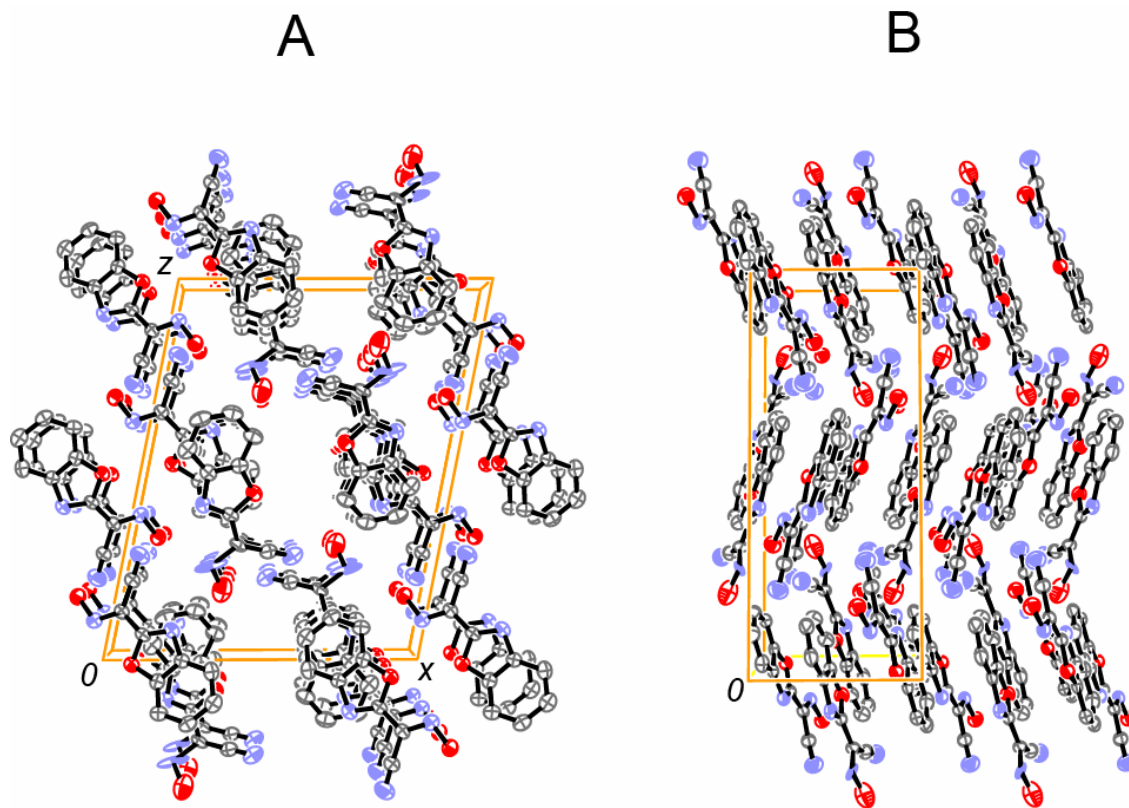

- A** - linear correlations between visible spectra of  $L^-$  and  $pK_a$  values of HL;  
**B** - linear correlation between visible spectra of  $L^-$  and Hammett  $\sigma$  constant for heteroaryl fragment.

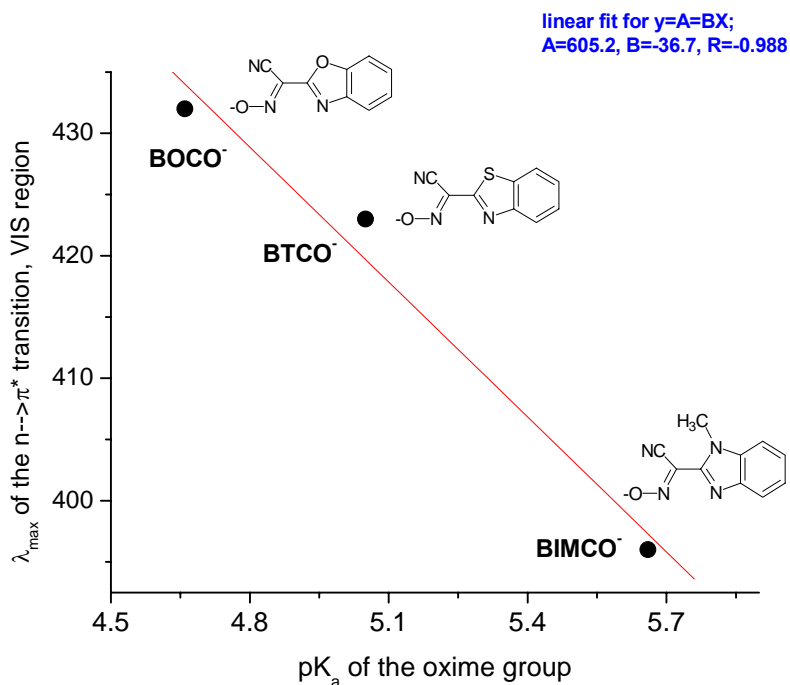

A

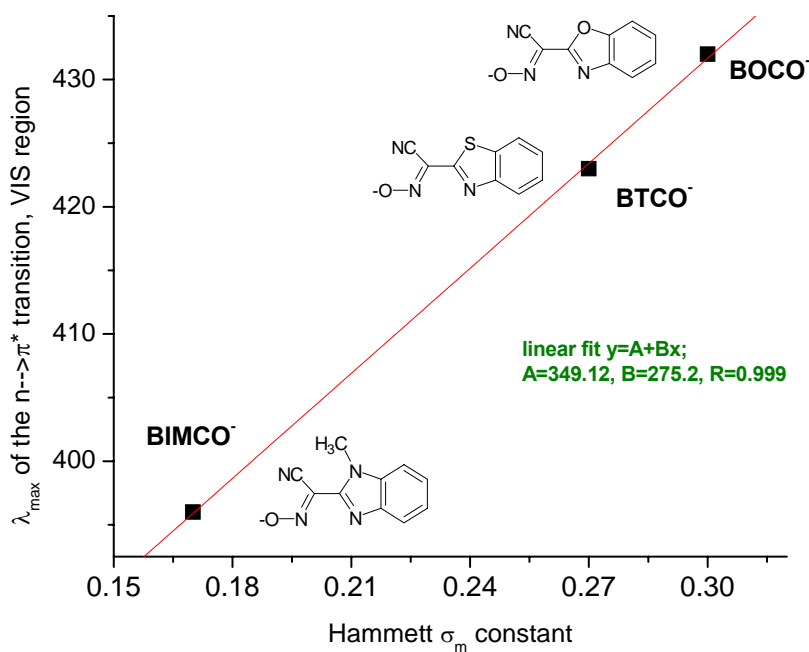

B

Linear correlations between  $pK_a$  of the cyanoxime and Hammett constants  $\sigma_p$  (A) and  $\sigma_m$  (B) of the 2-heteroaryl group highlighted in yellow.

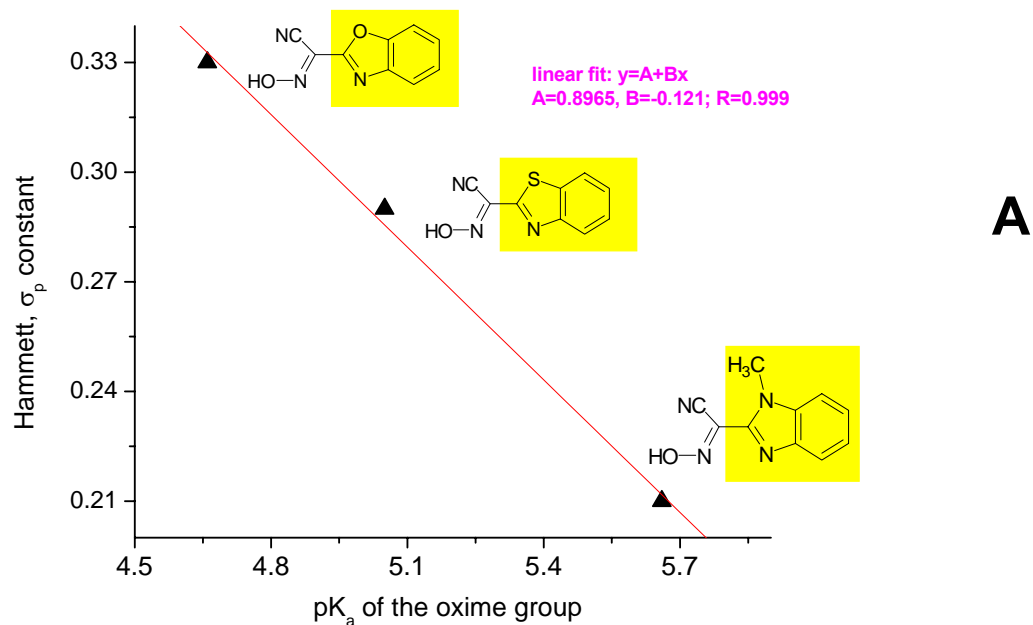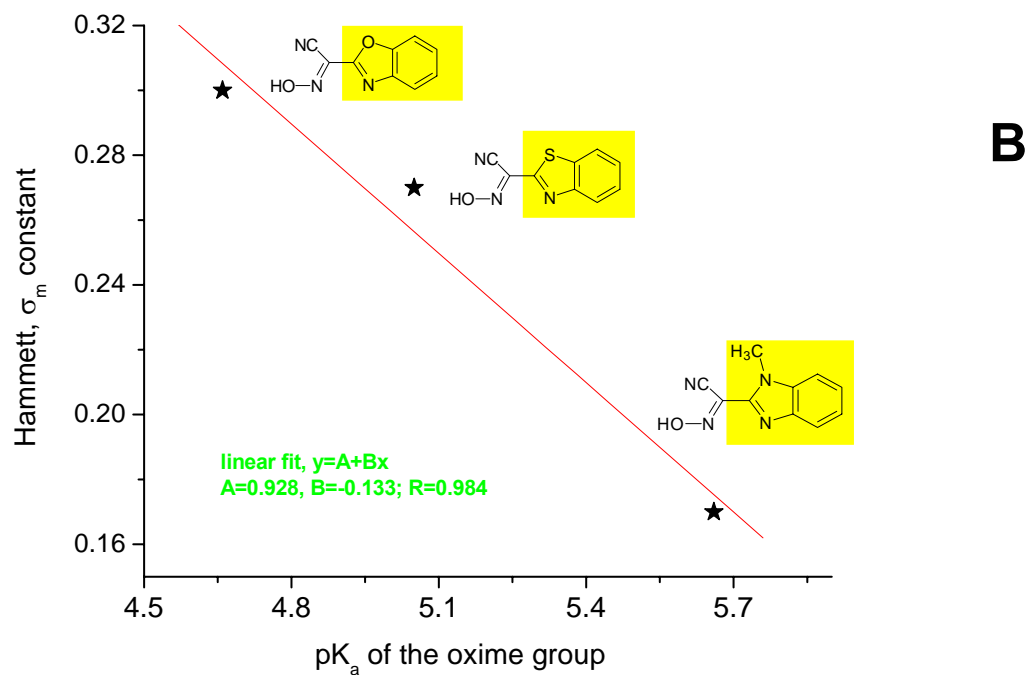

$^1\text{H}$  NMR spectra of HBIMCO (A) and HBTCO (B) in  $\text{dms}\text{-d}_6$  at 298 K.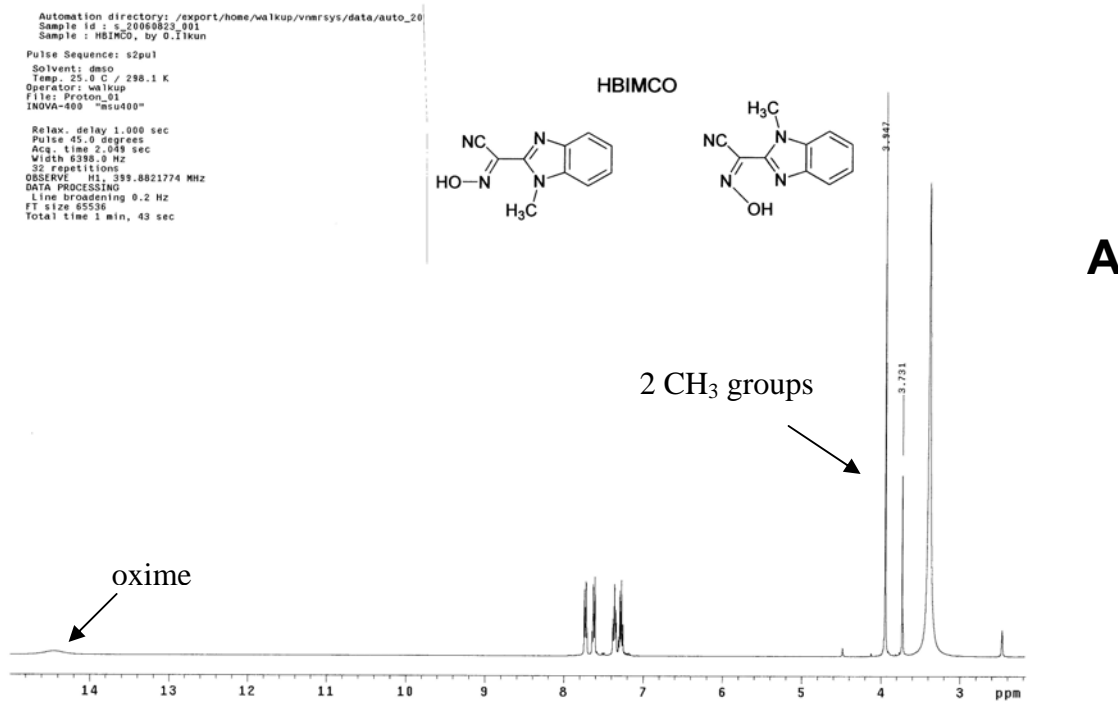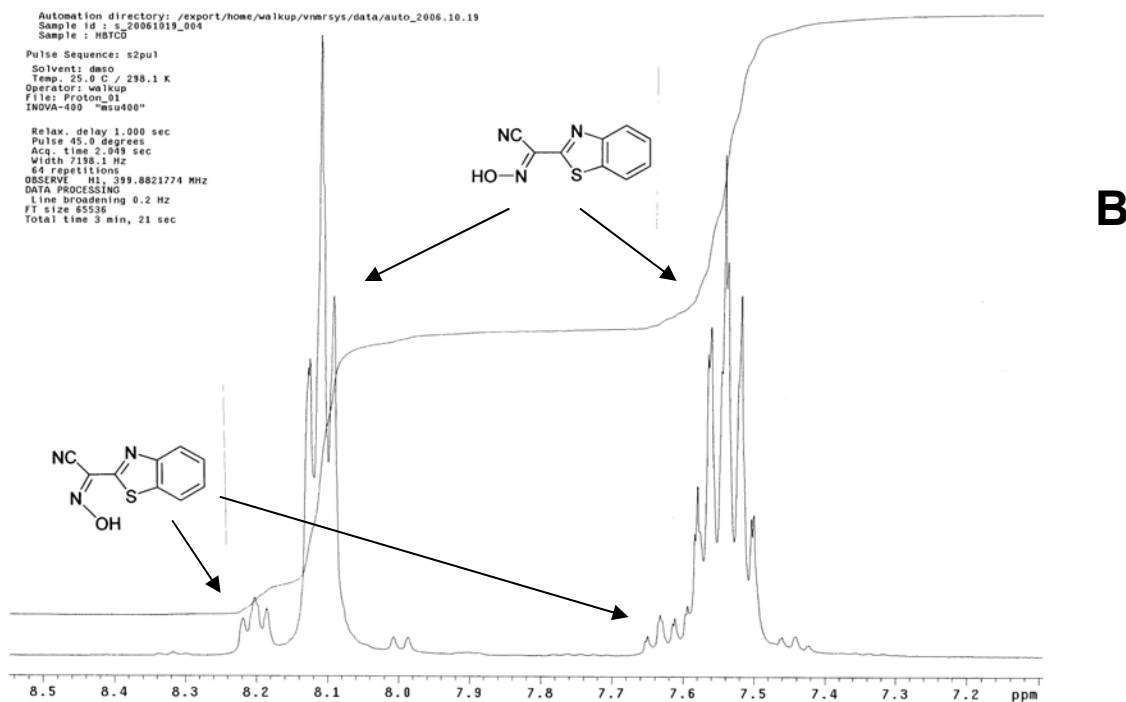

Fragments of  $^{13}\text{C}$  (A) and  $^1\text{H}$  (B) NMR spectra of benz(2-imidazolyl)cyanoxime in  $\text{dms}\text{-d}_6$  at 298K.

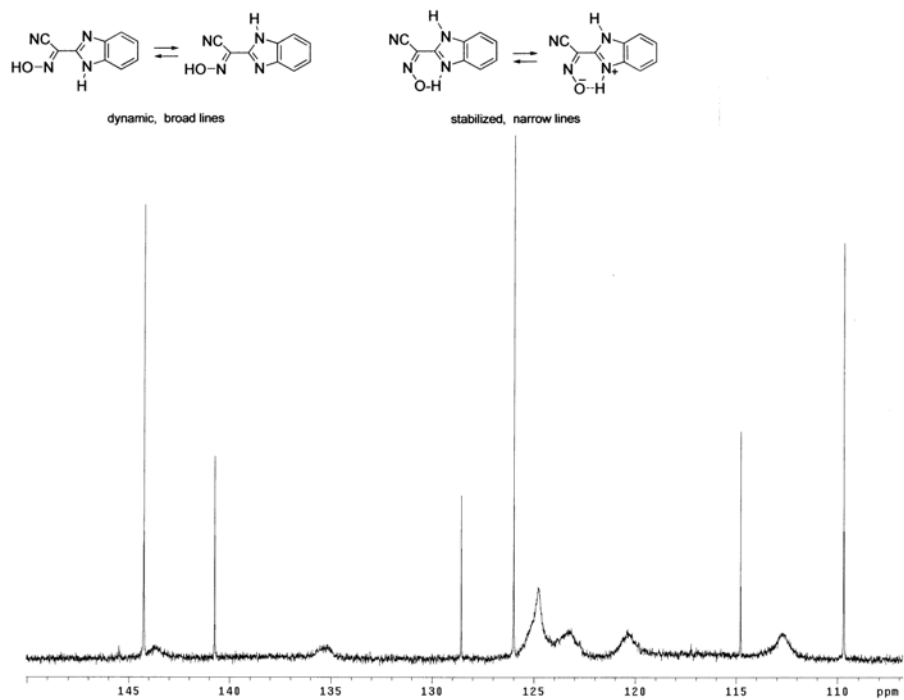

A

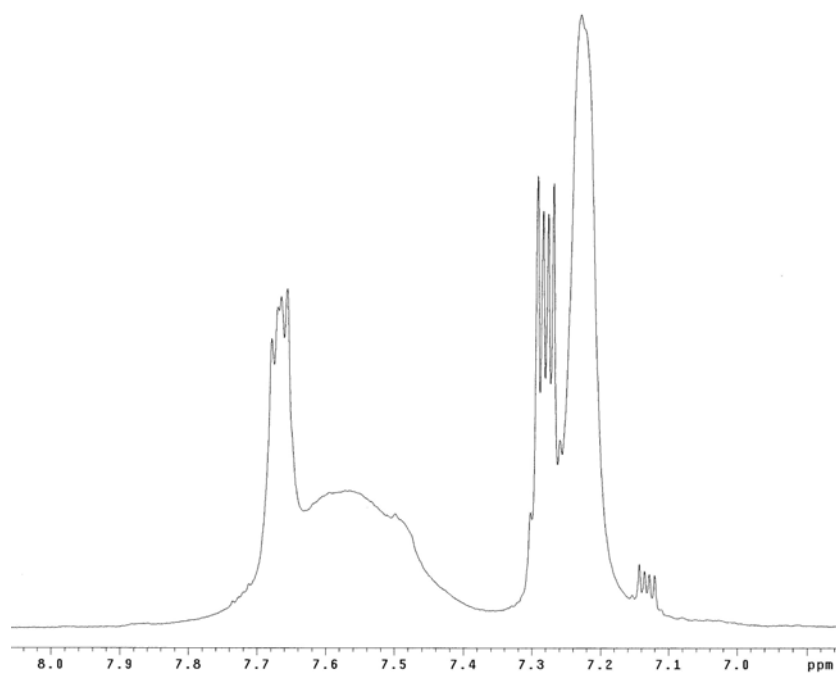

B

**Results of solutions electric conductivity measurements for synthesized benz(2-heteroaryl)cyanoximes and organic salts used as standards.**

| Compound                                      | Conductivity of 1 mM solutions $\Lambda_M$ (cm <sup>2</sup> /mol $\Omega$ ) |                      |                  |
|-----------------------------------------------|-----------------------------------------------------------------------------|----------------------|------------------|
|                                               | Solvent                                                                     |                      |                  |
|                                               | DMSO <sup>a</sup>                                                           | acetone <sup>b</sup> | DMF <sup>c</sup> |
| NBu <sub>4</sub> <sup>+</sup> Br <sup>-</sup> | 21.1                                                                        | 130.7                | 73.3             |
| PPh <sub>4</sub> <sup>+</sup> Br <sup>-</sup> | 28.8                                                                        | 145.1                | 66.0             |
| <b>HBOCO</b>                                  | <b>0.90</b>                                                                 | <b>1.7</b>           | <b>10.2</b>      |
| <b>HQCO</b>                                   | <b>4.47</b>                                                                 | <b>10.5</b>          | <b>14.2</b>      |
| HBIHCO                                        | 0.37                                                                        | 0.5                  | 7.0              |
| HBIMCO                                        | 0.35                                                                        | 0.3                  | 3.4              |
| HBTCO                                         | 0.28                                                                        | 0.2                  | 3.1              |

Tetrabutylammonium bromide and tetraphenylphosphonium bromide (both from ALDRICH) were used as standards for 1:1 type of electrolytes

<sup>a</sup> Conductivity of pure DMSO was 0.12

<sup>b</sup> Conductivity of pure acetone was 0.20

<sup>c</sup> Conductivity of pure DMF was 1.60

Fragments of UV-visible spectra of protonated (blue) and deprotonated (red) forms of the HBTCO (A) and HBIHCO (B), in EtOH at 296 K and  $5 \times 10^{-5}$  M concentration in 1 mm cuvettes. Clearly seen a bathochromic shift of bands in anions.

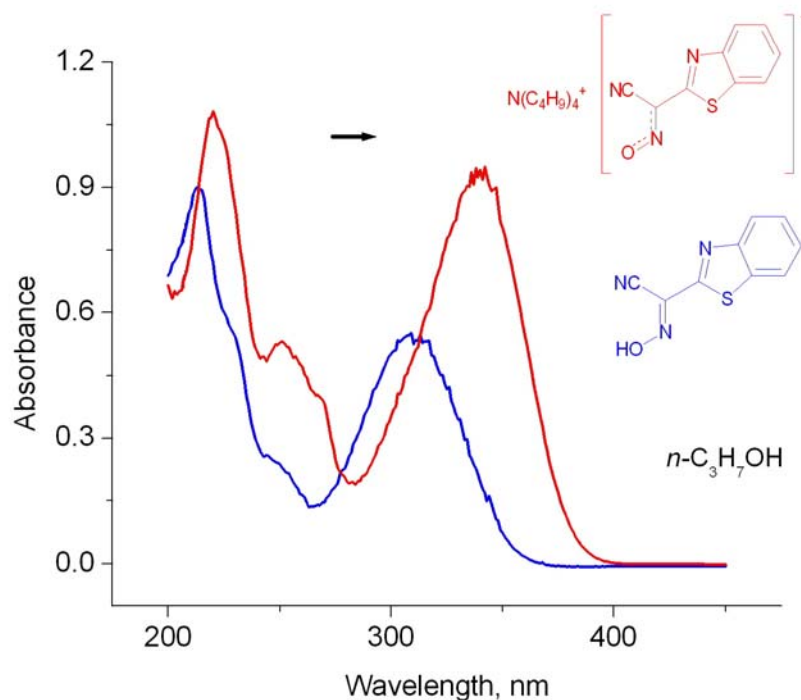

A

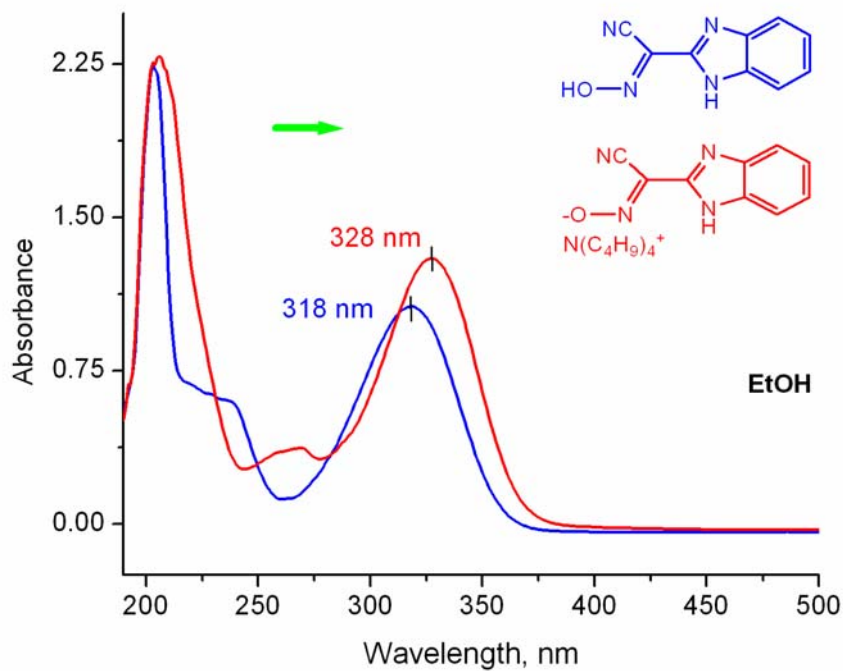

B



Linear correlations between the energy of  $n \rightarrow \pi^*$  transitions and solvent ROH parameters observed in UV-visible spectra of  $\text{BOCO}^-$  anion at 5 mM concentrations. Red: energy of transition vs  $\text{pK}_a$  of the solvent; linear fit for  $y = A+Bx$  with  $A = 41.39$ ,  $B = -0.001$  and  $R = -0.996$ . Blue: energy of transition vs Kosover<sup>#</sup> solvation energy  $Z$ ; linear fit for  $y = A+Bx$  with  $A = -101.5$ ,  $B = 0.0078$ ,  $R = 0.995$ .

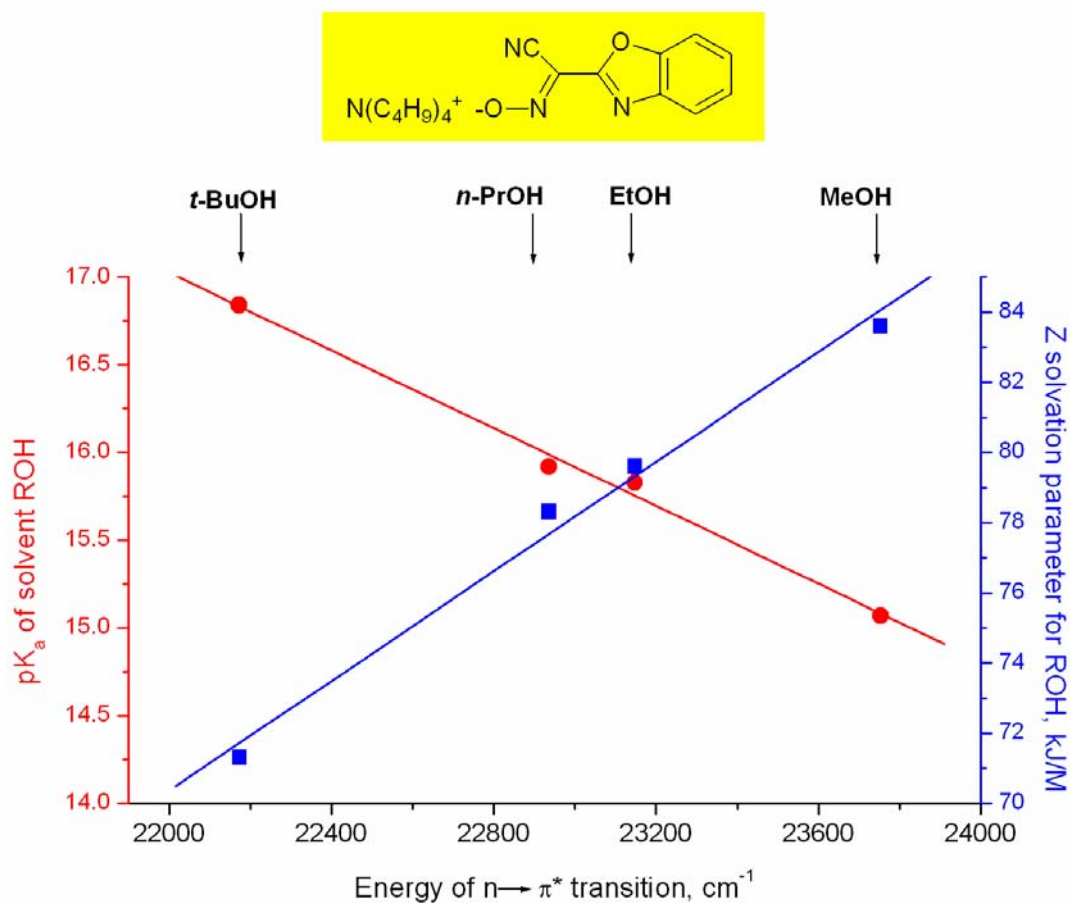

<sup>#</sup> - Kosower, E.M.; Hoffmann, D.; Wallenfels, K. *J. Am. Chem. Soc.*, **1962**, *84*, p. 2755-2760; actual  $Z$  values taken from "*The chemist companion (Handbook)*", by Gordon, A.J.; Ford, R.A.; John Wiley & Sons: New York, 1972.

Fluorescence of 2.36 mM ethanol solutions of HBIMCO and NaBIMCO at 296 K in 1 cm cuvette (A), and deconvolution of spectroscopic envelope for HBIMCO as three Gaussian type lines which belong to  $\pi^* \rightarrow \pi$  transitions (B).

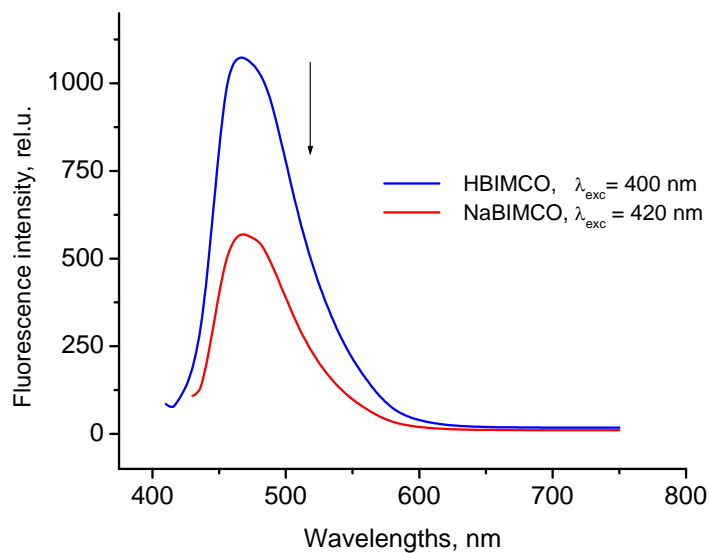

A

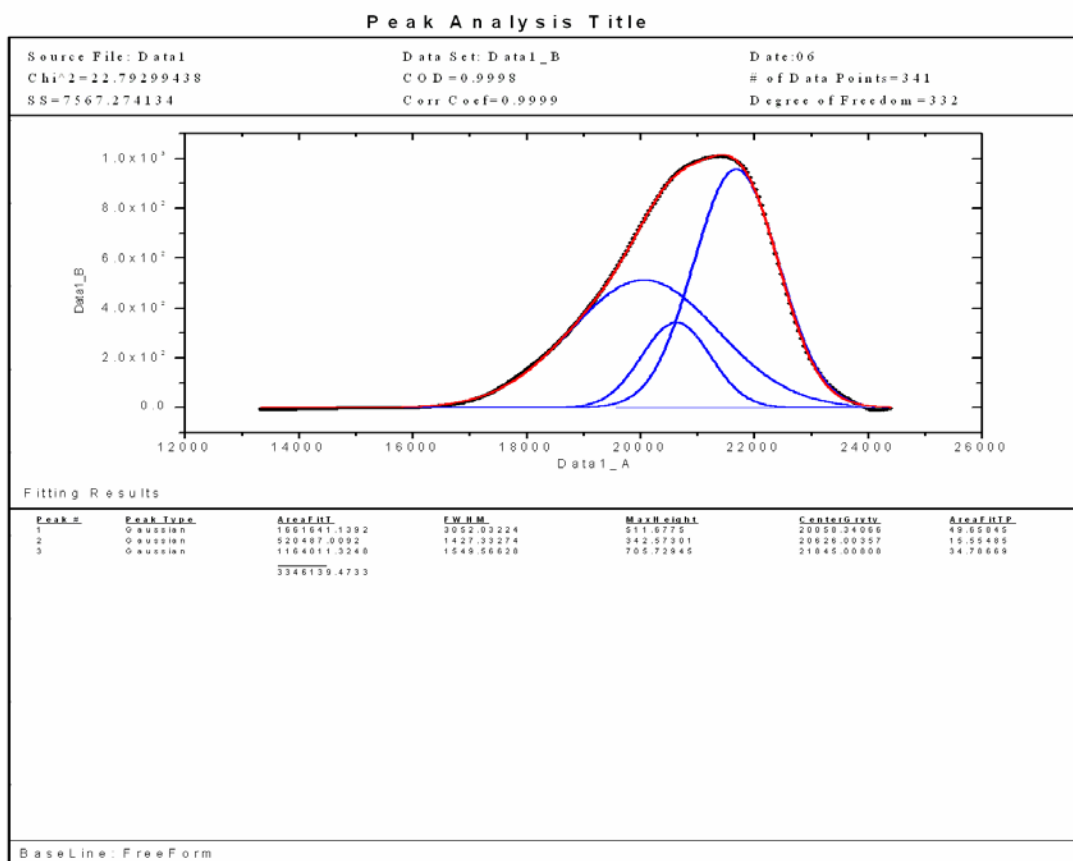

B

Photographs of 1 cm cuvette with bright blue fluorescent 2 mM solution of HBIHCO in EtOH;  $\lambda_{exc}=350$  nm. A - in the dark; B - with open to a day light compartment (fluorescence is still visible and shown with red arrows)

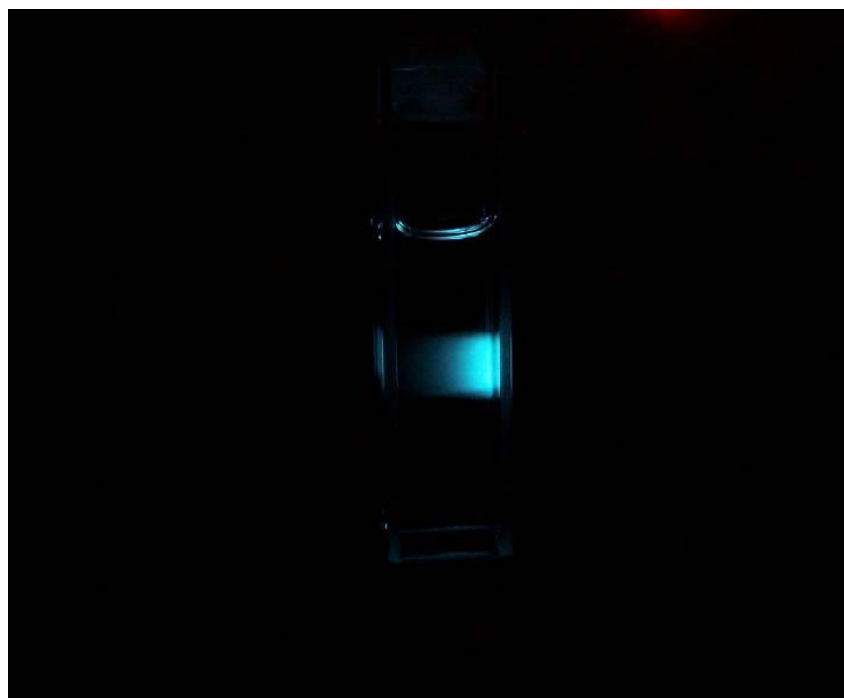

A

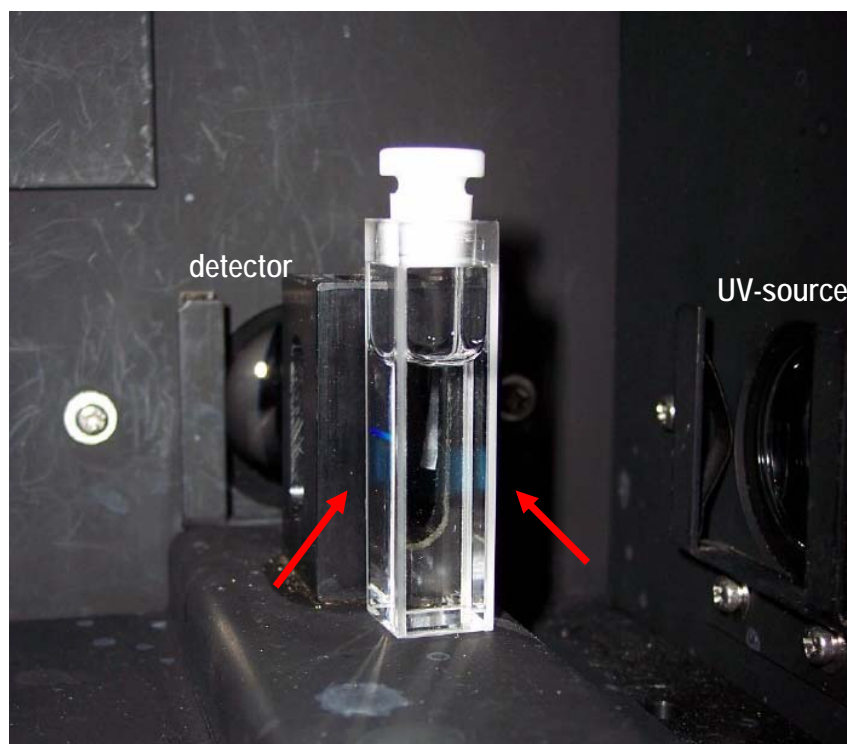

B

Actual photographs of polycrystalline samples of synthesized thallium(I) cyanoximates taken in reflected light with dark background at 60 × magnification. Clearly seen very fine fibrous, almost wool-like, texture of the Tl(BIMCO) and needles of Tl(BOCO).

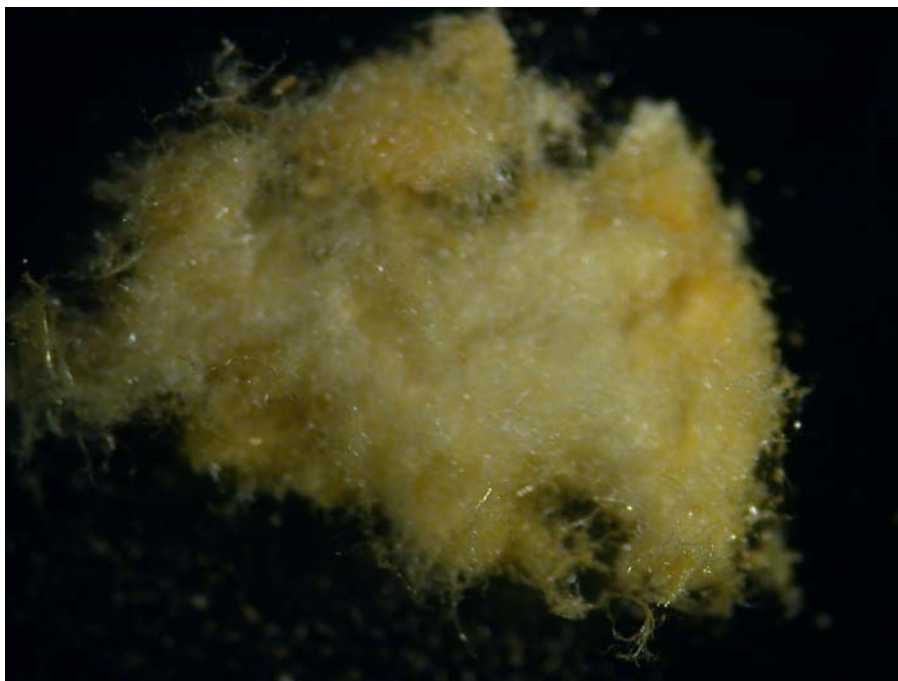

Tl(BIMCO)

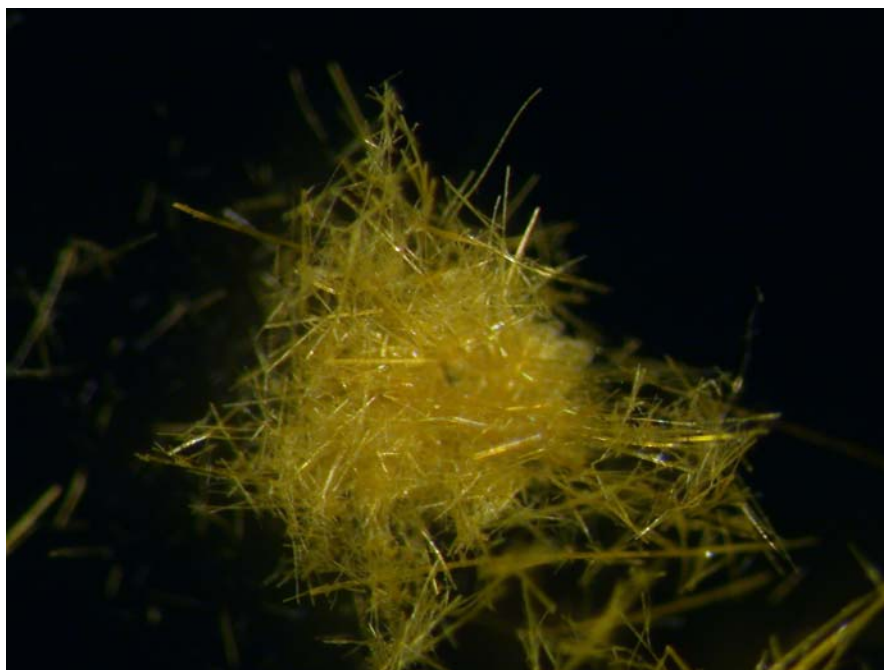

Tl(BOCO)

UV-visible spectra of solid samples of monovalent thallium benz(2-heteroaryl) cyanoximates obtained from fine suspensions of compounds in silicon oil. Spectra recorded at room temperature from paste-like samples squeezed between two quartz plates of 40 x 10 x 1 mm dimensions.

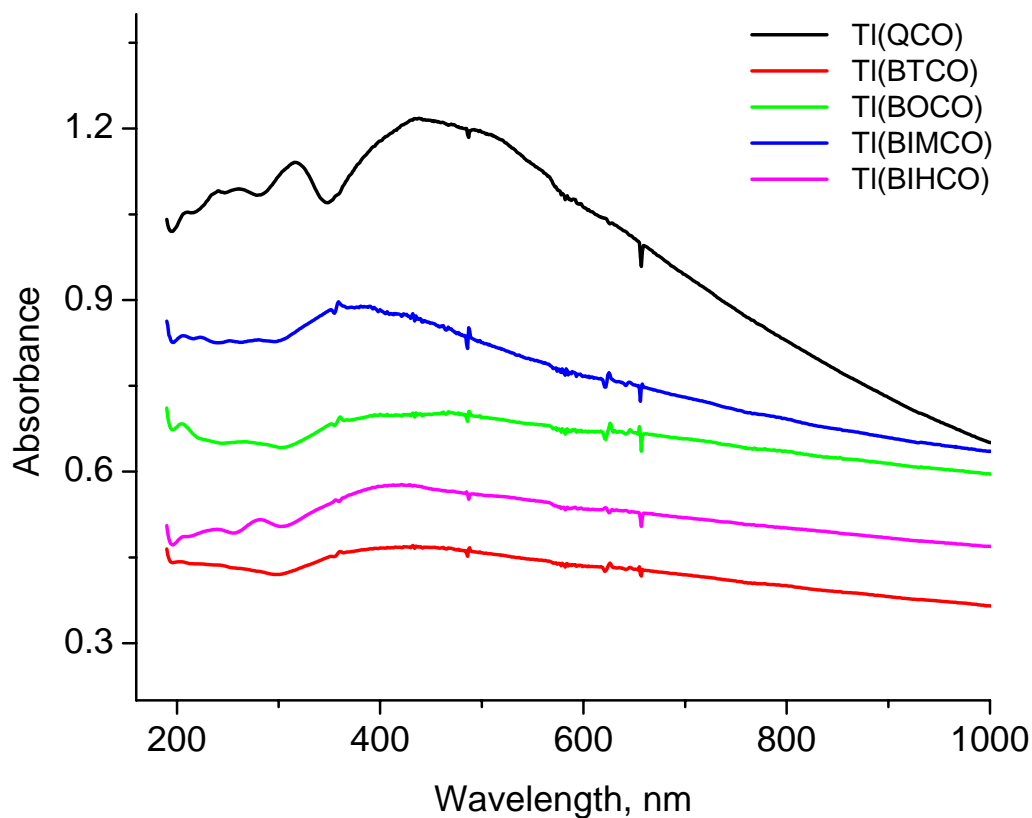

**TIL samples preparation prior to room temperature photoluminescence measurements.**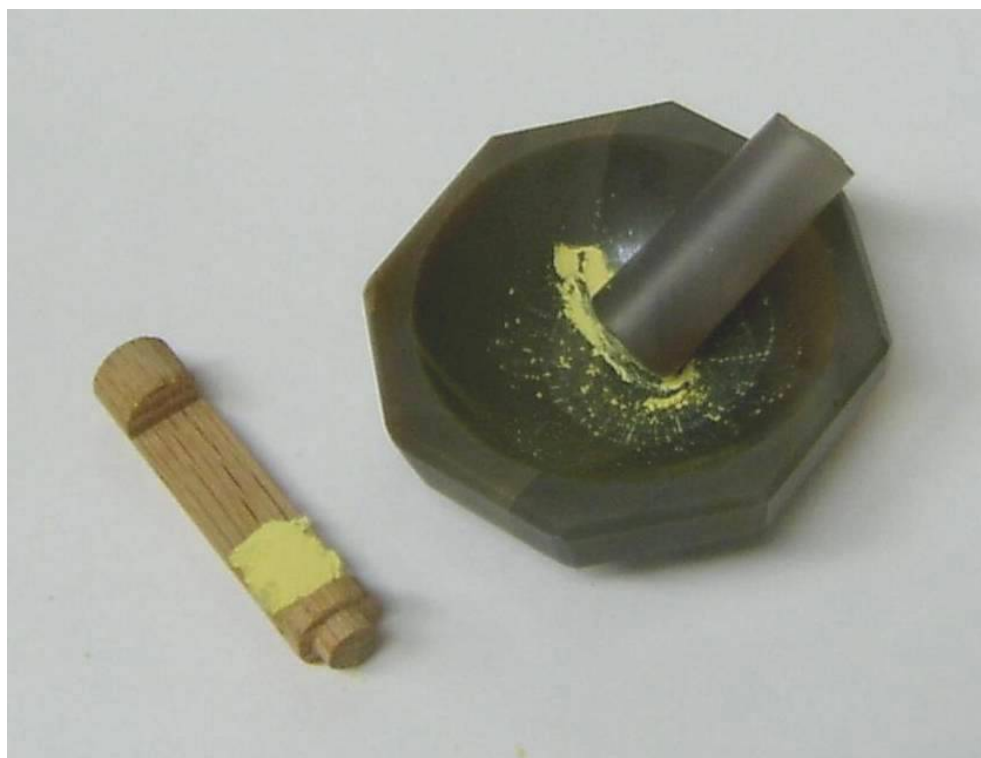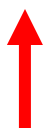

An insert (oak wood) into the cuvette holder for solid state photoluminescence measurements.

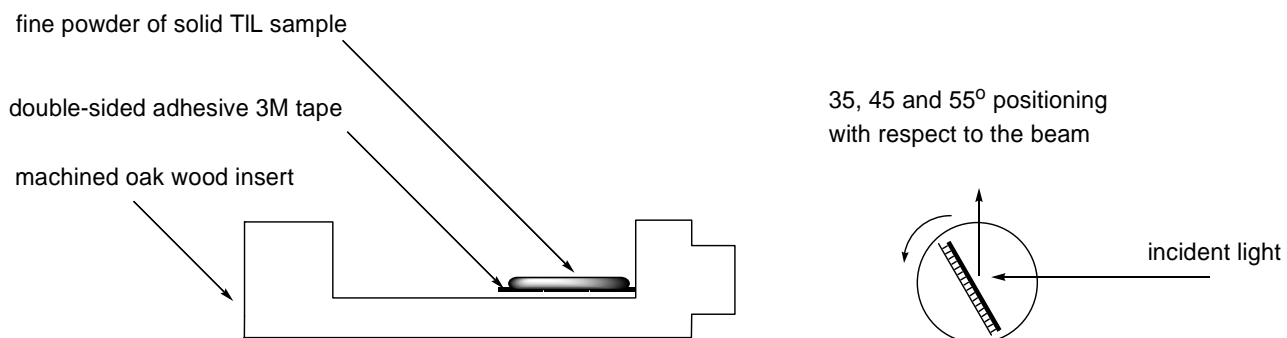

**Solid state room temperature emission spectra of Tl(BIHCO) (A), and Tl(BIMCO), (B) obtained using different excitation wavelengths. Dotted lines indicate cut-offs the instrument emission/excitation lines including second harmonics, while asterisks show the instrument artifacts.**

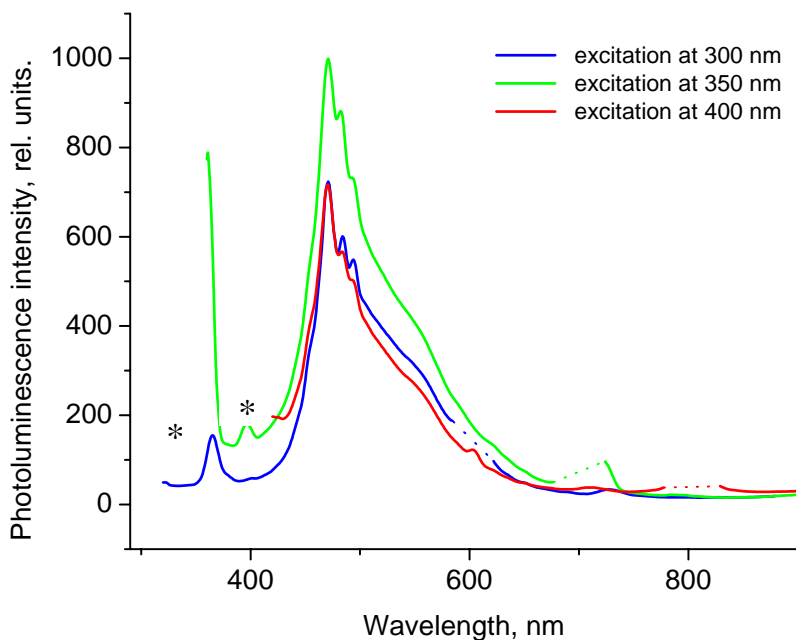

A

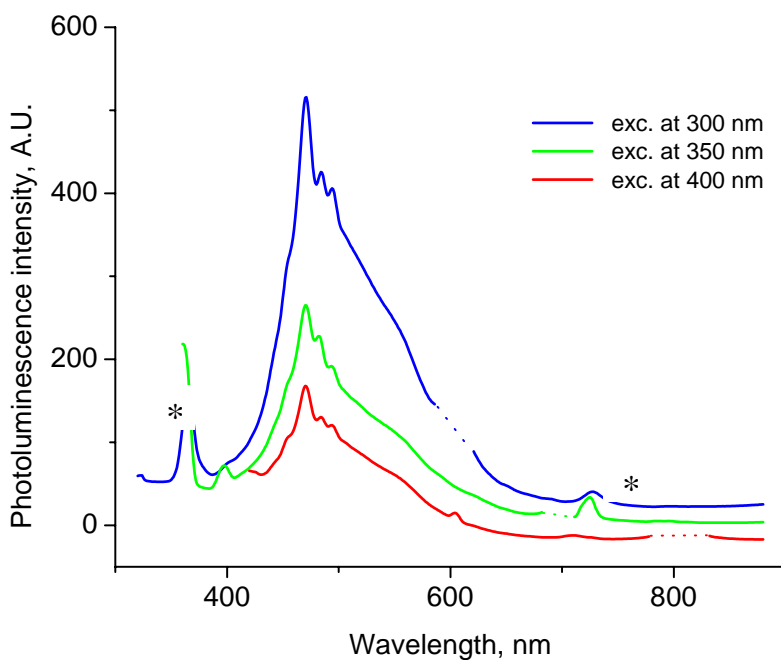

B

Solid state room temperature emission spectra of Tl(BOCO) (A), and Tl(BTCO), (B) obtained using different excitation wavelengths. Dotted lines indicate cut-offs the instrument emission/excitation lines including second harmonics, while asterisks show the instrument artifacts.

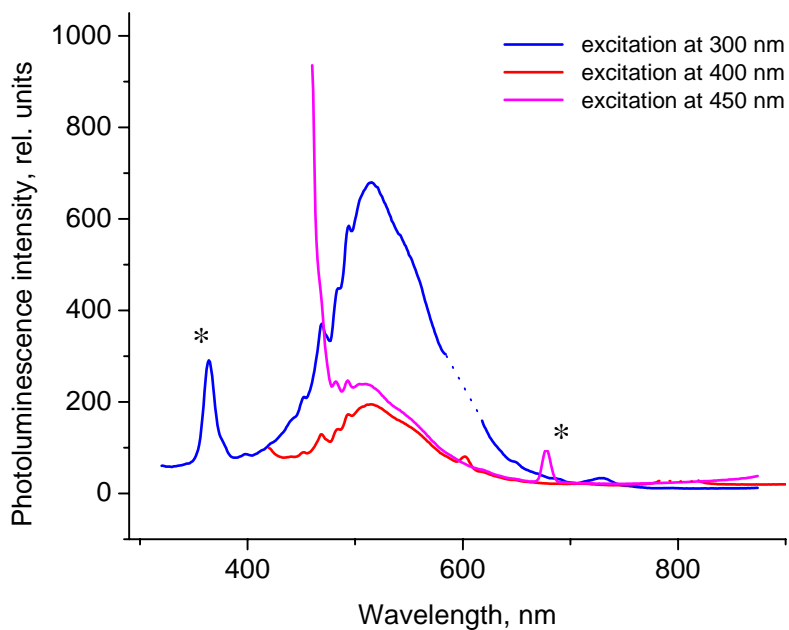**A**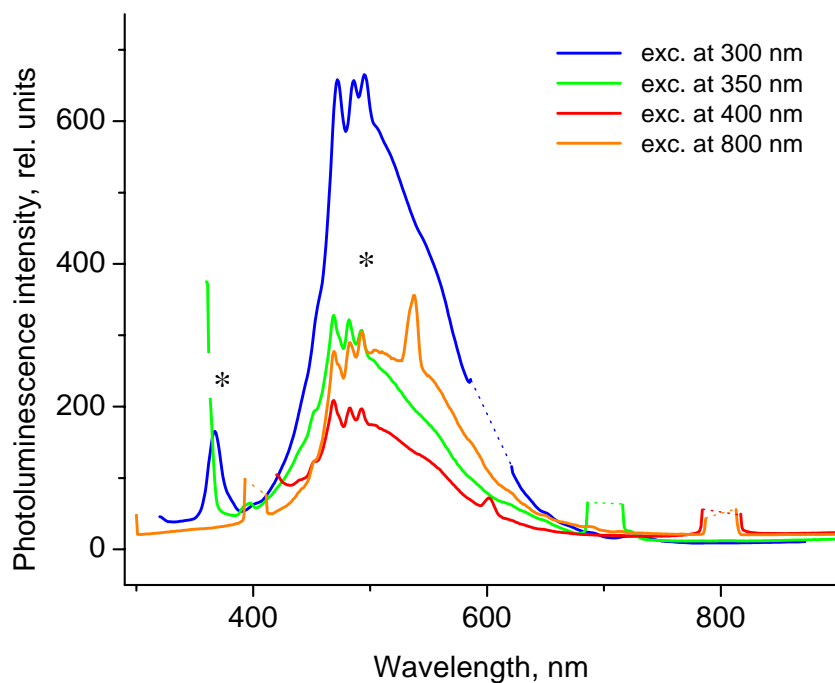**B**



Solid state room temperature emission spectra of Tl(QCO) obtained using different excitation wavelengths. Dotted lines indicate cut-offs the instrument emission / excitation lines including second harmonics, while asterisks show the instrument artifacts.

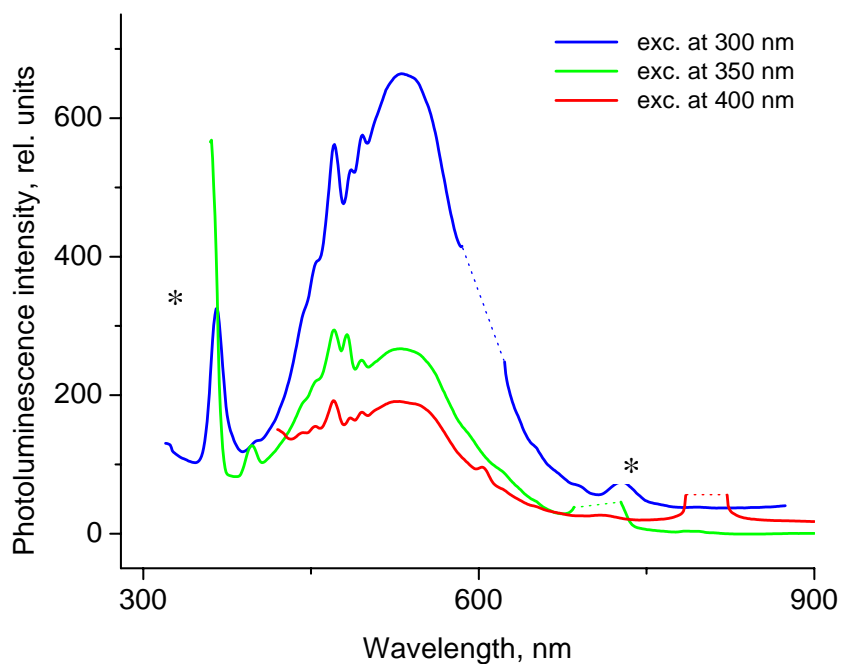

Supplement: b803846e.pdf [file b803846e.pdf]
